# Supplementary material for: Towards efficient and stable organic solar cells: fixing the morphology problem in block copolymer active layers with synergistic strategies supported by interpretable machine learning
Source: Royal Society of Chemistry journal article supplement (doi:10.1039/d4ee03168g), 2024-01-01
Supplement: d4ee03168g1.pdf [file d4ee03168g1.pdf]

## Electronic Supplementary Material

### **Towards Efficient and Stable Organic Solar Cells: Fixing the Morphology Problem in Block Copolymer Active Layer with Synergistic Strategies Supported by Interpretable Machine Learning**

Yu Cui,<sup>a</sup> Qunping Fan,<sup>a</sup> Hao Feng,<sup>b</sup> Tao Li,<sup>b</sup> Dmitry Yu. Paraschuk,<sup>c</sup> Wei Ma,<sup>a</sup> and Han Yan<sup>\*a</sup>

<sup>a</sup> State Key Laboratory for Mechanical Behavior of Materials, School of Materials Science and Engineering, Xi'an Jiaotong University, Xi'an 710049, China. E-mail: mseyanhan@xjtu.edu.cn.

<sup>b</sup> Center for Spintronics and Quantum Systems, State Key Laboratory for Mechanical Behavior of Materials, School of Materials Science and Engineering, Xi'an Jiaotong University, Xi'an 710049, China.

<sup>c</sup> Faculty of Physics, Lomonosov Moscow State University, Leninskie Gory 1/62, Moscow 119991, Russia.

## 1. Experimental section

**1.1 Materials.** PM6 and Y6 were purchased from Solarmer Materials Inc. N-DMBI and chloroform (CF) were purchased from Sigma-Aldrich. All chemicals were used as received without further purification.

**1.2 BHJ device fabrication.** N-DMBI were dissolved in chloroform solvent with different concentrations (0.1mg/mL, 0.01mg/mL, 0.001mg/mL) and stirred on a hot plate at room temperature. PM6:PYIT (16 mg/mL, D/A = 1:0.87), Y6 (15 mg/mL), and PM6-b-PYIT (15 mg/mL) were dissolved in CF and stirred on a hot plate at 50 °C for 2 hours. All the organic solar cells were fabricated in a conventional device structure of ITO/PEDOT:PSS/active layer/PDINO/Al. Blended solutions were spin-coated on the substrates to form 100 nm films. Then a thin PDINO layer (2 mg/mL in methanol, 3300 rpm for 30 s) was spin-coated on the active layer. Finally, 100 nm Ag was deposited at a vacuum level of  $< 4 \times 10^{-5}$  Pa. The typical device area (0.04 cm<sup>2</sup>) was defined by a metal mask with aligned aperture.

**1.3 GIWAXS characterization.** GIWAXS measurements were performed at beamline 7.3.3 at the Advanced Light Source.<sup>1</sup> Samples were prepared on Si substrates using identical blend solutions as those used in devices. The 10 keV X-ray beam was incident at a grazing angle of 0.11°-0.15°, selected to maximize the scattering intensity from the samples. The scattered x-rays were detected using a Dectris Pilatus 2M photon counting detector. Crystal coherence lengths (CCLs) values of the materials were calculated using Scherrer equation:

$$\text{CCLs} = \frac{2\pi K}{\Delta q}$$

$K$  (shape factor) = 0.9 and  $\Delta q$  = full width half maximum (FWHM) of the scattering.

**1.4 DFT and TD-DFT calculation.** We apply density functional theory (DFT) and time-dependent density functional theory (TD-DFT) to study the interaction among PM6-b-PYIT, the PM6-block, the PYIT-block, Y6 and N-DMBI. All DFT calculations

in this work were performed using the ORCA 5.0.0 package.<sup>2, 3</sup> The gas-phase ground state geometry of the molecules was determined using the B3LYP/G D3 def2-TZVP method. We then used the M062X functional and base set with the polarizable continuum model (PCM) to perform all the remaining DFT calculations. The quantitative molecular surface analysis, non-covalent interaction (NCI) analysis and Mulliken charge population analysis were performed with the use of Multiwfn.<sup>4</sup>

**1.5 Molecular polarity index (MPI).** The electrostatic potential is directly determined by the charge distribution within a system; an uneven distribution of charge within a molecule manifests itself as a distinctive pattern of electrostatic potential across the molecular surface. Consequently, characterizing the features of the electrostatic potential distribution over a molecule's surface allows for quantification of the molecule's polarity. The molecular polarity index (MPI) is defined as follow:

$$\text{MPI} = (1/A) \int \int_S |V(\mathbf{r})| dS$$

Here,  $V$  represents the molecular electrostatic potential, and integration is performed over the molecular surface  $S$ , with  $A$  denoting the molecular surface area. A larger MPI signifies a greater overall polarity of the molecule. This is because the unevenness of the charge distribution serves as a manifestation of molecular polarity; the more pronounced the heterogeneity of the charge distribution, the more likely it is to produce highly positive or highly negative regions on the molecular surface, thereby resulting in a higher MPI value. The MPIs were calculated by Multiwfn.<sup>4</sup>

**1.6 Calculating the SCLC mobility.** The SCLC mobility ( $\mu$ ) was measured with the hole-only device structure of ITO/PEDOT:PSS/active layer/MoO<sub>3</sub>/Al and electron-only device structure of ITO/ZnO/active layer/PFN-Br/Al. The thickness of all the active layers is maintained at approximately 100 nm. The values of SCLC mobility were obtained by fitting the current density-voltage curves according to

$$J = \frac{9\varepsilon_0\varepsilon_r\mu V^2}{8d^3}$$

where  $\epsilon_0$  is the permittivity of vacuum,  $\epsilon_r$  is the relative permittivity of the active layer and it is assumed to be 3.5 here.

**1.7 Kelvin Probe Force Microscopy:** KPFM images were obtained by a commercial SPM system (MFP3D, Oxford Instruments, USA). The surface potential was defined as  $(\Phi_{\text{tip}} - \Phi_{\text{sample}})/e$ . The conductive probe tip used in the measurements was Pt coated.

**1.8 Other measurements.** TM-AFM images were scanned by Bruker INNOVA. The J-V curves were performed in the N<sub>2</sub>-filled glovebox under AM 1.5G (100 mW cm<sup>-2</sup>) using an AAA solar simulator (SS-F5-3A, Enli Technology Co., Ltd.) calibrated with a standard photovoltaic cell equipped with KG5 filter. The EQE curves were measured by Solar Cell Spectral Response Measurement System QE-R3018 (Enli Technology Co., Ltd.) with calibrated light intensity by a standard Si photovoltaic cell. ESR spectra were tested on Bruker Biospin A300-9.5/12. ESR spectra were tested on Bruker Biospin A300-9.5/12. PL spectra were recorded by FLS980 spectrometer (Edinburgh Instruments, EI). The thickness of all the PL samples maintained at approximately 100 nm.

**1.9 Machine Learning.** XGBoost ML algorithm was chosen because it uses parallelized processing, which can steadily improve the accuracy of the model. To avoid overfitting, grid search with 5-fold cross-validation (CV) was used to optimize the hyperparameters (Table S13). The dataset was split into a training dataset (70%) and a test dataset (30%). Root mean squared error (RMSE) and coefficient of determination ( $r^2$ ) were used to check the performance of ML model:

$$\text{MSE} = \sum_{i=1}^m \frac{1}{m} (x_i - y_i)^2$$

$$\text{RMSE} = \sqrt{\text{MSE}}$$

$$r^2 = 1 - \frac{\text{MSE}}{\text{Var}(y)}$$

$x_i$  is the predicted value of the model,  $y_i$  is the target variable and  $\text{Var}(y)$  is the variance of the sample data. The coefficient of determination ( $r^2$ ) indicates the prediction ability

of the model. Its value ranges between 0 and 1, and a value close to one indicates more prediction accuracy.

## 2. Supplementary figures

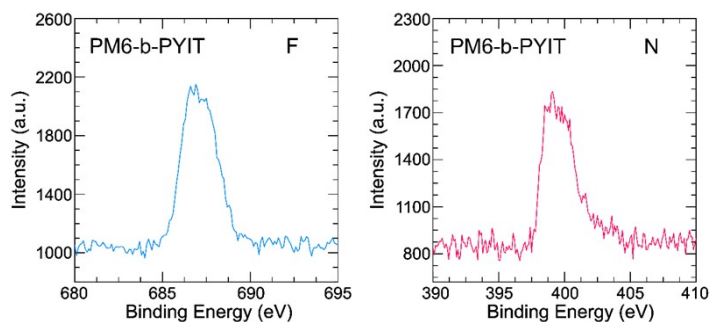

**Fig. S1.** XPS spectra: F 1s and N 1s spectrum of PM6-b-PYIT.

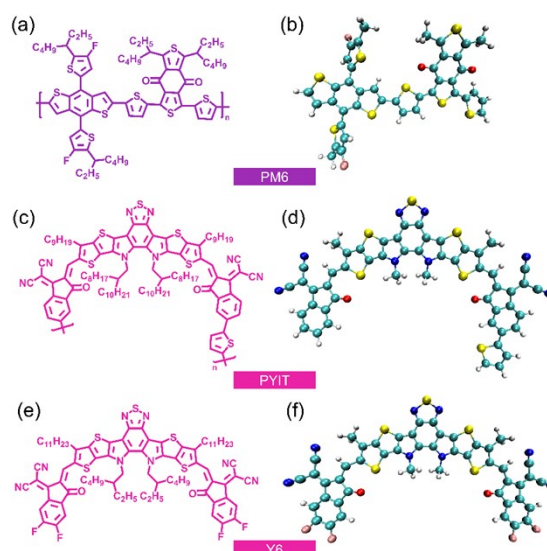

**Fig. S2.** Chemical structures and DFT calculated optimal geometries of (a)(b) PM6 (poly(((4,8-bis(5-(2-ethylhexyl)-4-fluoro-2-thienyl)benzo[1,2-b:4,5-b']dithiophene-2,6-diyl)-2,5-thiophenediyl(5,7-bis(2-ethylhexyl)-4,8-dioxo-4H,8H-benzo[1,2-c:4,5-c']dithiophene-1,3-diyl)-2,5-thiophenediyl))), (c)(d) PYIT (poly[2,2'-((2Z,2'Z)-((12,13-bis(2-octyldodecyl)-3,9-diundecyl-12,13-dihydro-[1,2,5]thiadiazolo[3,4-e]thieno[2'',3'':4,5']thieno[2',3':4,5]pyrrolo[3,2-g]thieno[2',3':4,5]thieno[3,2-b]indole-2,10-diyl)bis(methanylylidene))bis(5,6-difluoro-3-oxo-2,3-dihydro-1H-indene-2,1-diylidene))dimalononitrile-co-2,5-thiophene]) and (e)(f) Y6 (2,2'-((2Z,2'Z)-((12,13-bis(2-ethylhexyl)-3,9-diundecyl-12,13-dihydro-[1,2,5]thiadiazolo[3,4-e]thieno[2'',3'':4,5']thieno[2',3':4,5]pyrrolo[3,2-g]thieno[2',3':4,5]thieno[3,2-b]indole-2,10-diyl)bis(methanylylidene))bis(5,6-difluoro-3-oxo-2,3-dihydro-1H-indene-2,1-diylidene))dimalononitrile)

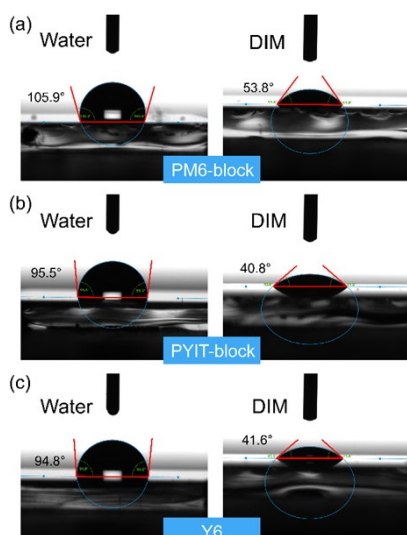

**Fig. S3.** The contact angle images of (a) PM6, (b) PYIT and (c) Y6.

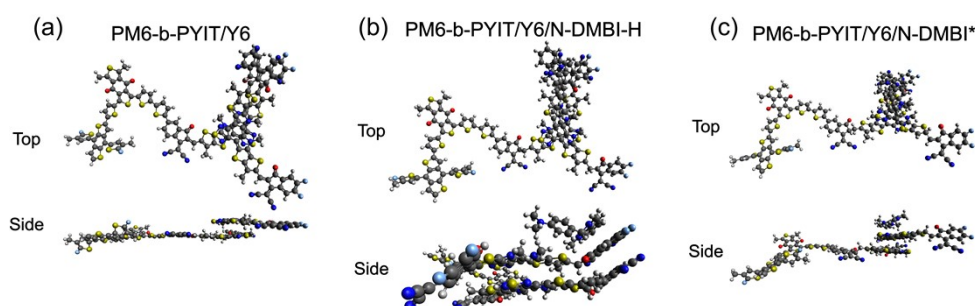

**Fig. S4.** DFT calculated optimal geometries of (a) PM6- PYIT unit/Y6, (b) PM6- PYIT unit/Y6/N-DMBI and (c) PM6- PYIT unit/Y6/N-DMBI\* complexes.

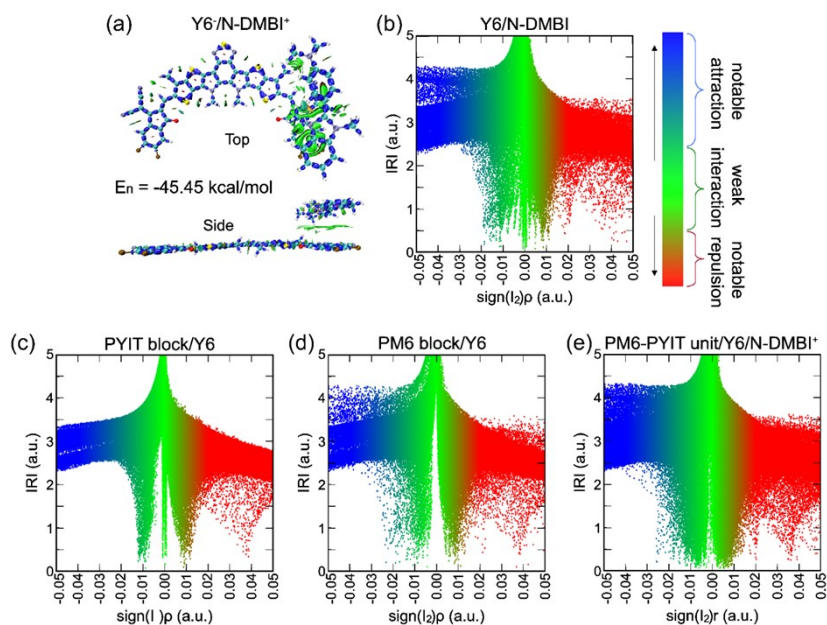

**Fig. S5.** (a) NCI calculated by reduced density gradient analysis of Y6<sup>-</sup>/N-DMBI<sup>+</sup> complex and the respective non-covalent energy ( $E_n$ ). The NCI interaction scatter plots of (b) Y6<sup>-</sup>/N-DMBI<sup>+</sup>, (c) PYIT block/Y6, (d) PM6 block/Y6 and (e) PM6-PYIT unit/Y6<sup>-</sup>/N-DMBI<sup>+</sup> complex.

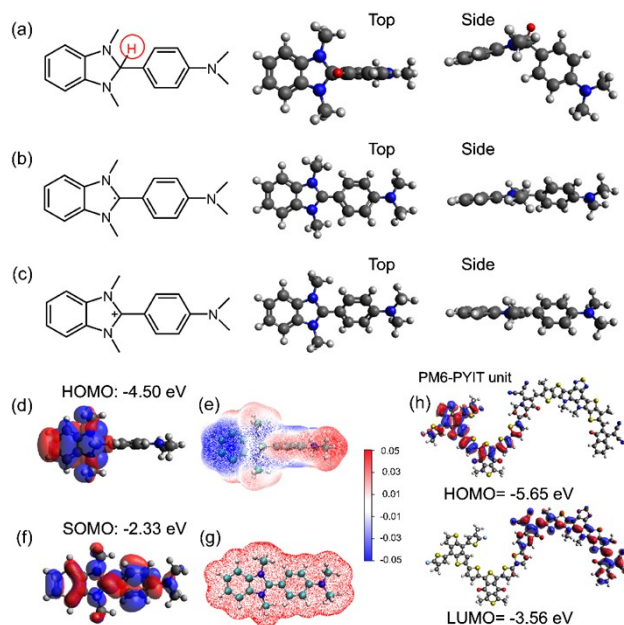

**Fig. S6.** Chemical formula and optimized molecular geometries of the neutral (a) N-DMBI, (b) radical N-DMBI<sup>\*</sup>, and (c) cation N-DMBI<sup>+</sup>. Pictorial representation and energies of (d) the HOMO of N-DMBI and (f) the SOMO of N-DMBI<sup>\*</sup>. Electrostatic potential (ESP) of (e) N-DMBI and (g) N-DMBI<sup>+</sup>. (h) The calculated highest occupied molecular orbital (HOMO) and lowest unoccupied molecular orbital (LUMO) of PM6-PYIT unit.

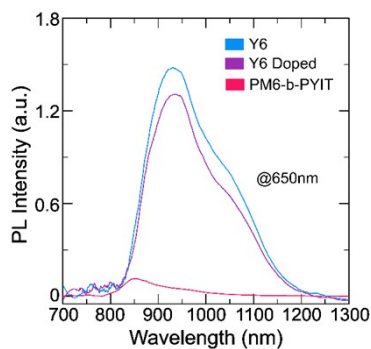

**Fig. S7.** PL spectra of the pristine Y6, Y6 doped by N-DMBI, and PM6-b-PYIT films. The PL intensities are normalized to the corresponding absorption of the films at the excitation wavelength of 650 nm.



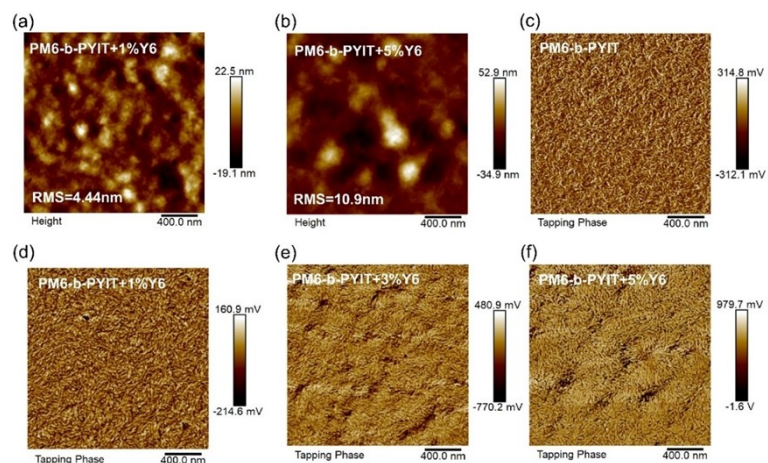

**Fig. S8.** AFM height image for (a) PM6-b-PYIT+1%Y6 and (b) PM6-b-PYIT+5%Y6 film. Phase images for (c) pristine PM6-b-PYIT, (d) PM6-b-PYIT+1%Y6, (e) PM6-b-PYIT+3%Y6 and (f) PM6-b-PYIT+5%Y6 films.

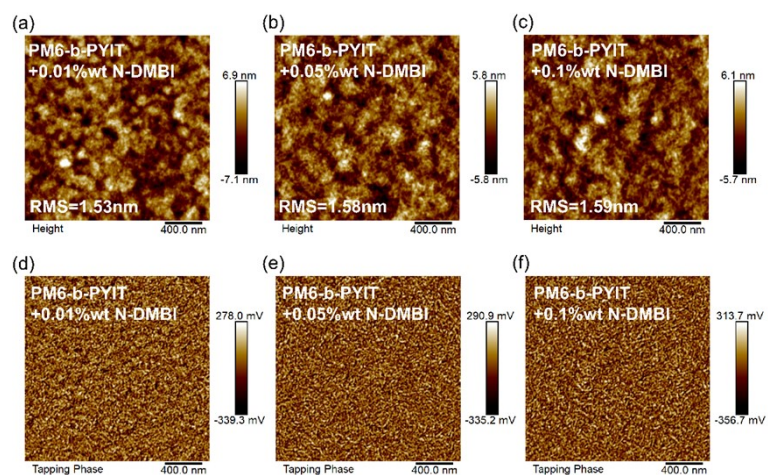

**Fig. S9.** AFM height and phase images for (a) and (d) PM6-b-PYIT+0.01%wt N-DMBI; (b) and (e) PM6-b-PYIT+0.05%wt N-DMBI; (c) and (f) PM6-b-PYIT+0.1%wt N-DMBI films.

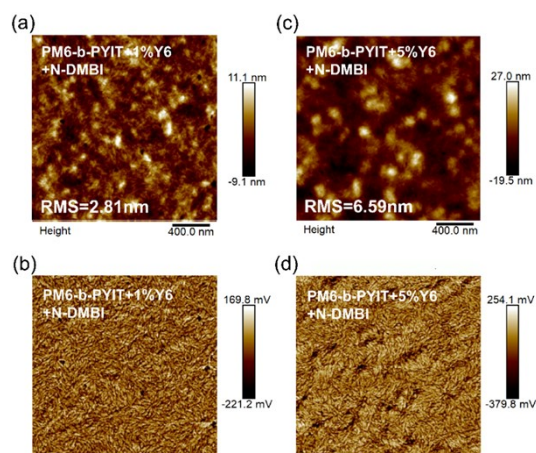

**Fig. S10.** AFM height and phase images for (a, b) PM6-b-PYIT+1%Y6 doped, (c, d) PM6-b-PYIT+5%Y6 doped films.



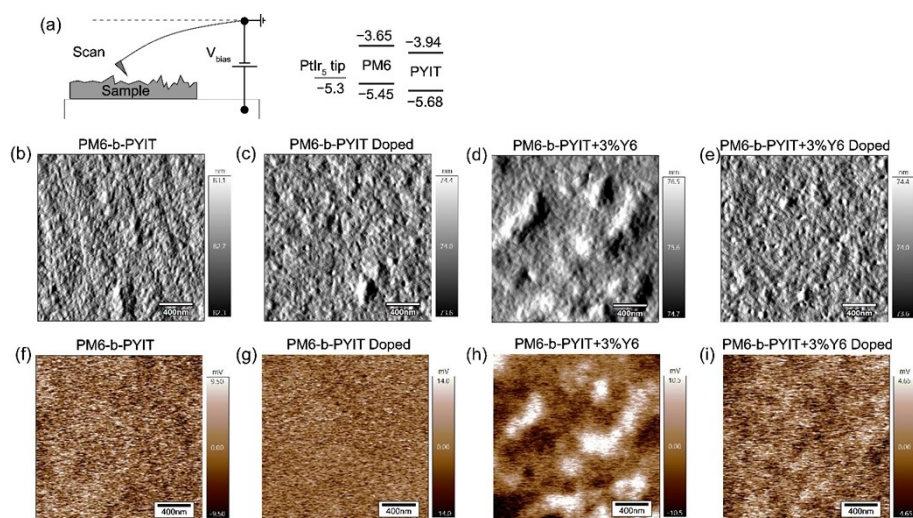

**Fig. S11.** (a) Schematic diagram of KPFM test. Height and KPFM image of (b, f) PM6-b-PYIT, (c, g) PM6-b-PYIT doped, (d, h) PM6-b-PYIT+3%Y6 and (e, i) PM6-b-PYIT+3%Y6 doped films, respectively.

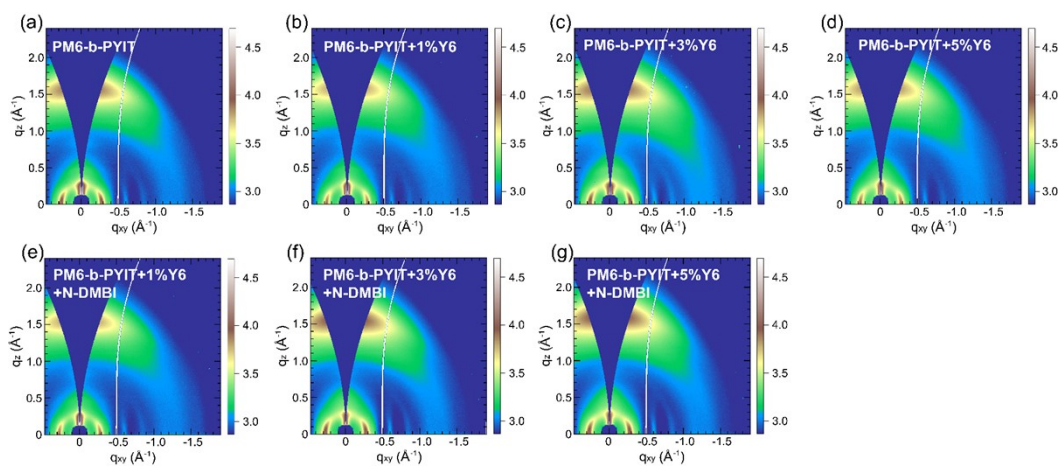

**Fig. S12.** 2D GIWAXS patterns for the films studied.

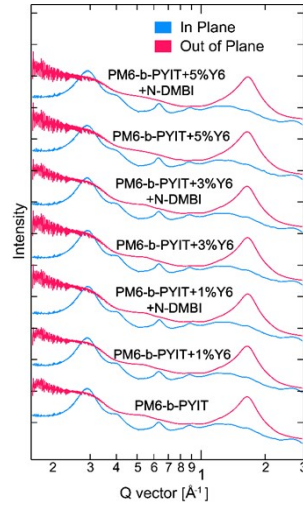

**Fig. S13.** Out-of-plane and in-plane 1D scattering profiles for the data from Fig. S13.

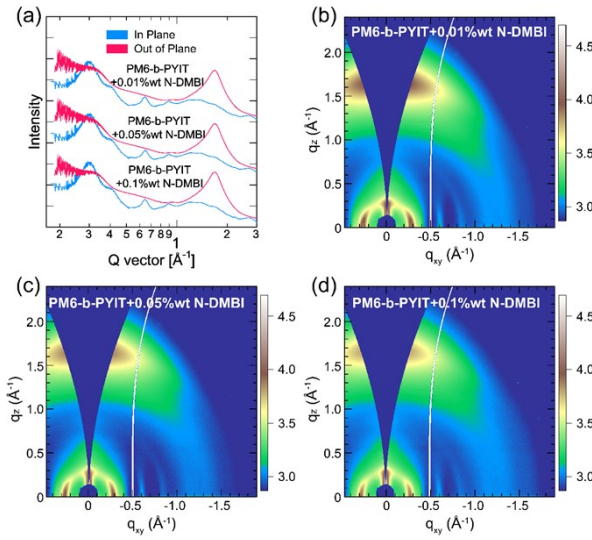

**Fig. S14.** (a) 1D scattering profiles of out-of-plane (OOP) and in-plane (IP) for PM6-b-PYIT+0.01%wt N-DMBI, PM6-b-PYIT+0.05%wt N-DMBI, and PM6-b-PYIT+0.1%wt N-DMBI films. (b-d) 2D GIWAXS patterns for their corresponding films.

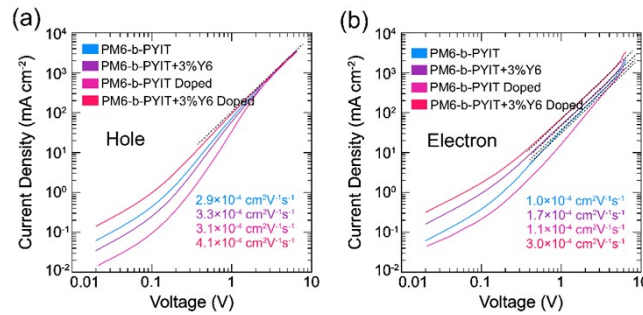

**Fig. S15.** (a) Hole-only and (b) electron-only charge transport curves of the pristine PM6-b-PYIT, PM6-b-PYIT+3%Y6, PM6-b-PYIT doped, and PM6-b-PYIT+3%Y6 doped devices.

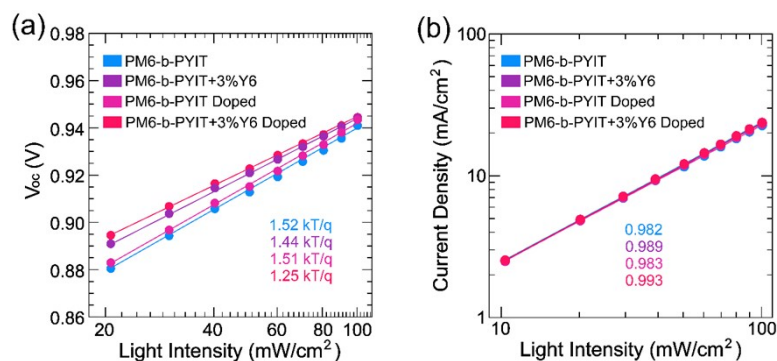

**Fig. S16.**  $V_{OC}$  and  $J_{SC}$  as a function of the light intensity.

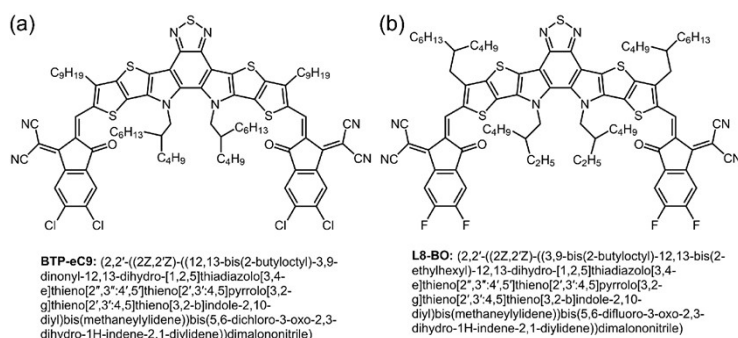

**Fig. S17.** Chemical structures and full names of (a) BTP-eC9 and (b) L8-BO.

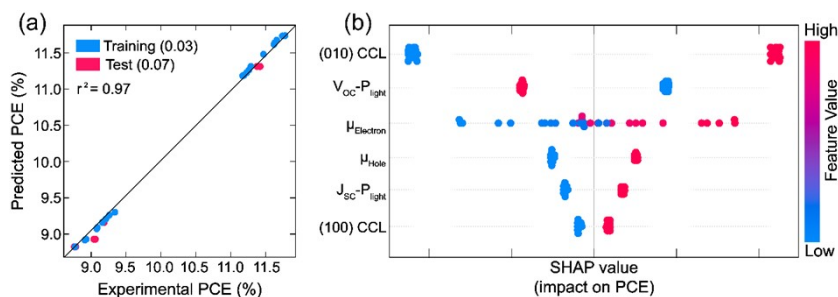

**Fig. S18.** (a) Predicted PCE by machine learning versus the experimental PCE. (b) Illustration of features contributing to photovoltaic performances by SHAP values. The relative contributions of morphology and charge transport/recombination parameters for PCE.

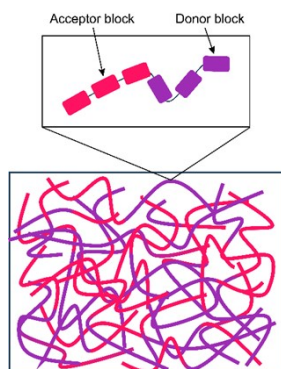

**Fig. S19.** Schematic of the unoptimized BCP morphology.

### 3. Supplementary tables

**Table S1.** The elemental analysis data of the block copolymer PM6-b-PYIT.

|            | Element | Mass Fraction (%) | Atomic Fraction (%) |
|------------|---------|-------------------|---------------------|
| PM6-b-PYIT | N       | 71.34             | 77.31               |
|            | F       | 28.66             | 22.69               |

**Table S2.** The photovoltaic performance parameters of OSCs based on PM6:PYIT (D:A = 1:0.87) and PM6-b-PYIT under the illumination of AM 1.5G, 100 mW cm<sup>-2</sup>.<sup>a</sup>

| Photoactive Layer          | V <sub>OC</sub> (V)   | J <sub>SC</sub> (mA/cm <sup>2</sup> ) | FF (%)            | PCE (%)           |
|----------------------------|-----------------------|---------------------------------------|-------------------|-------------------|
| PM6:PYIT<br>(D:A = 1:0.87) | 0.965 (0.961 ± 0.002) | 24.1 (23.9 ± 0.2)                     | 63.3 (61.0 ± 0.7) | 14.6 (14.2 ± 0.2) |
| PM6-b-PYIT                 | 0.943 (0.942 ± 0.001) | 23.1 (23.0 ± 0.1)                     | 60.7 (60.3 ± 0.1) | 13.2 (12.9 ± 0.2) |

<sup>a</sup>The parameters are obtained from 10 independent devices.

**Table S3.** Contact angle, surface energy and molecular polarity index of the used materials.

| Materials  | Θ <sub>water</sub> (°) | Θ <sub>DIM</sub> (°) | Surface energy (mN/m) | Molecular polarity index (MPI) (kcal/mol) |
|------------|------------------------|----------------------|-----------------------|-------------------------------------------|
| PM6 block  | 105.9                  | 53.8                 | 31.74                 | 7.32                                      |
| PYIT block | 95.5                   | 40.8                 | 36.84                 | 10.76                                     |
| Y6         | 94.8                   | 41.6                 | 37.87                 | 11.51                                     |

**Table S4.** Enthalpy changes for the hydrogen atom removal reaction.

| Enthalpy Change                            | kcal/mol |
|--------------------------------------------|----------|
| ΔH <sub>H•</sub> (PM6-PYIT unit/N-DMBI)    | 33.8     |
| ΔH <sub>H•</sub> (PM6-PYIT unit/Y6/N-DMBI) | 20.3     |

**Table S5.** Summary of the related energy quantities for the hydrogen atom removal reaction.

| Enthalpy                                                             | kcal/mol |
|----------------------------------------------------------------------|----------|
| ΔE <sub>H•</sub> (N-DMBI)                                            | 83.4     |
| IP(N-DMBI*)                                                          | 57.3     |
| E <sub>n</sub> (PM6-PYIT unit/N-DMBI)                                | -16.3    |
| E <sub>n</sub> (PM6-PYIT unit <sup>-</sup> /N-DMBI <sup>+</sup> )    | -32.3    |
| E <sub>n</sub> (PM6-PYIT unit+Y6/N-DMBI)                             | -27.5    |
| E <sub>n</sub> (PM6-PYIT unit+Y6 <sup>-</sup> /N-DMBI <sup>+</sup> ) | -44.0    |

**Table S6.** Charge transfer amounts (CT) from the dopants to semiconductors.

| Mulliken charge population analysis |                              |
|-------------------------------------|------------------------------|
|                                     | Charge Transfer ( <i>e</i> ) |
| PM6-b-PYIT/Y6/N-DMBI                | 0.17                         |
| PM6-b-PYIT/Y6/N-DMBI*               | 0.98                         |

**Table S7.** Calculated crystal coherence lengths (CCLs) from GIWAXS patterns.

| Conditions                     | (010) (Å) |       | (11-1) (Å) |        | (100) (Å) |        |
|--------------------------------|-----------|-------|------------|--------|-----------|--------|
|                                | FWHM<br>M | CCLs  | FWHM       | CCLs   | FWHM      | CCLs   |
| PM6-b-PYIT                     | 0.306     | 18.46 | 0.064      | 88.71  | 0.131     | 50.33  |
| PM6-b-PYIT+1%Y6                | 0.284     | 19.89 | 0.052      | 108.99 | 0.056     | 100.18 |
| PM6-b-PYIT+1%Y6+0.05%wt N-DMBI | 0.243     | 23.29 | 0.047      | 120.18 | 0.050     | 112.47 |
| PM6-b-PYIT+3%Y6                | 0.282     | 20.02 | 0.051      | 111.76 | 0.049     | 114.11 |
| PM6-b-PYIT+3%Y6+0.05%wt N-DMBI | 0.265     | 21.36 | 0.052      | 109.09 | 0.048     | 116.88 |
| PM6-b-PYIT+5%Y6                | 0.269     | 21.06 | 0.056      | 101.12 | 0.056     | 101.40 |
| PM6-b-PYIT+5%Y6+0.05%wt N-DMBI | 0.269     | 19.08 | 0.052      | 107.94 | 0.053     | 105.72 |
| PM6-b-PYIT+0.01%wt N-DMBI      | 0.308     | 18.35 | 0.065      | 86.95  | 0.111     | 50.92  |
| PM6-b-PYIT+0.05%wt N-DMBI      | 0.308     | 18.35 | 0.064      | 88.31  | 0.113     | 50.02  |
| PM6-b-PYIT+0.1%wt N-DMBI       | 0.310     | 18.23 | 0.066      | 85.64  | 0.113     | 50.02  |

**Table S8.** Photovoltaic performance of PM6-b-PYIT based OSCs fabricated by different amount of CN additives under the illumination of AM 1.5G, 100 mW cm<sup>-2</sup>.<sup>a</sup>

| Condition              | V <sub>oc</sub> (V) | J <sub>sc</sub> (mA/cm <sup>2</sup> ) | FF (%)          | PCE (%)         |
|------------------------|---------------------|---------------------------------------|-----------------|-----------------|
| PM6-b-PYIT             | 0.940 (0.939±0.001) | 22.7 (22.4±0.2)                       | 59.0 (58.6±0.3) | 12.6 (12.4±0.1) |
| PM6-b-PYIT<br>+0.5% CN | 0.945 (0.943±0.001) | 23.2 (23.0±0.2)                       | 59.5 (58.3±1.3) | 13.0 (12.5±0.3) |
| PM6-b-PYIT<br>+1% CN   | 0.943 (0.942±0.001) | 23.1 (23.0±0.1)                       | 60.7 (60.3±0.1) | 13.2 (12.9±0.2) |
| PM6-b-PYIT<br>+2% CN   | 0.944 (0.941±0.002) | 23.2 (23.1±0.1)                       | 58.5 (58.3±1.1) | 12.8 (12.4±0.3) |

<sup>a</sup> The parameters are obtained from 10 independent devices.**Table S9.** Photovoltaic performance of OSCs fabricated by direct doping of PM6-b-PYIT with N-DMBI under the illumination of AM 1.5G, 100 mW cm<sup>-2</sup>.<sup>a</sup>

| Condition                     | V <sub>oc</sub> (V) | J <sub>sc</sub> (mA/cm <sup>2</sup> ) | FF (%)          | PCE (%)         |
|-------------------------------|---------------------|---------------------------------------|-----------------|-----------------|
| PM6-b-PYIT<br>+0.01%wt N-DMBI | 0.944 (0.942±0.002) | 22.8 (22.4±0.2)                       | 59.3 (57.9±0.9) | 12.8 (12.5±0.1) |
| PM6-b-PYIT<br>+0.05%wt N-DMBI | 0.945 (0.943±0.001) | 22.9 (22.3±0.5)                       | 59.5 (57.3±1.3) | 12.9 (12.5±0.3) |
| PM6-b-PYIT<br>+0.1%wt N-DMBI  | 0.944 (0.941±0.002) | 22.5 (22.2±0.2)                       | 60.0 (58.0±1.1) | 12.8 (12.4±0.3) |

<sup>a</sup> The parameters are obtained from 10 independent devices.

**Table S10.** Device performance of PM6-b-PYIT devices incorporating different Y6 amounts and N-DMBI dopants under the illumination of AM 1.5G, 100 mW cm<sup>-2</sup>. <sup>a</sup>

| Condition                             | V <sub>OC</sub> (V) | J <sub>SC</sub> (mA/cm <sup>2</sup> ) | FF (%)          | PCE (%)          |
|---------------------------------------|---------------------|---------------------------------------|-----------------|------------------|
| PM6-b-PYIT<br>+1%Y6                   | 0.931 (0.928±0.001) | 23.6 (23.3±0.2)                       | 66.0 (64.6±1.0) | 14.5 (14.2±0.2)  |
| PM6-b-PYIT<br>+1%Y6+0.01%wt<br>N-DMBI | 0.931 (0.930±0.001) | 23.4 (23.2±0.2)                       | 66.6 (64.9±0.9) | 14.6 (14.3±0.2)  |
| PM6-b-PYIT<br>+1%Y6+0.05%wt<br>N-DMBI | 0.931 (0.929±0.002) | 24.0 (23.8±0.1)                       | 65.4 (64.7±0.4) | 14.6 (15.3±0.2)  |
| PM6-b-PYIT<br>+1%Y6+0.1%wt N-<br>DMBI | 0.931 (0.930±0.001) | 24.4 (24.2±0.2)                       | 66.0 (65.0±0.5) | 15.0 (14.8±0.2)  |
| PM6-b-PYIT<br>+3%Y6                   | 0.931 (0.928±0.002) | 23.8 (23.7±0.1)                       | 66.4 (65.6±0.4) | 14.7 (14.5±0.1)  |
| PM6-b-PYIT<br>+3%Y6+0.01%wt<br>N-DMBI | 0.936 (0.933±0.002) | 23.7 (23.53±0.1)                      | 67.6 (67.1±0.3) | 15.0 (14.8±0.10) |
| PM6-b-PYIT<br>+3%Y6+0.05%wt<br>N-DMBI | 0.944 (0.943±0.001) | 24.6 (24.2±0.3)                       | 68.5 (68.2±0.2) | 15.9 (15.5±0.3)  |
| PM6-b-PYIT<br>+3%Y6+0.1%wt N-<br>DMBI | 0.938 (0.936±0.002) | 23.9 (23.8±0.2)                       | 67.5 (66.6±0.6) | 15.1 (14.8±0.3)  |
| PM6-b-PYIT<br>+5%Y6                   | 0.931 (0.930±0.001) | 23.3 (23.1±0.2)                       | 63.3 (63.2±0.8) | 13.7 (13.6±0.1)  |
| PM6-b-PYIT<br>+5%Y6+0.01%wt<br>N-DMBI | 0.931 (0.930±0.001) | 23.9 (23.6±0.2)                       | 63.0 (62.5±0.4) | 14.0 (13.8±0.2)  |

<sup>a</sup> The parameters are obtained from 10 independent devices.

**Table S11.** The  $n$  values obtained from fitting the V<sub>OC</sub>-P<sub>light</sub> curves.

|                | PM6-b-PYIT       | PM6-b-PYIT<br>doped | PM6-b-PYIT+Y6    | PM6-b-PYIT+Y6<br>+N-DMBI |
|----------------|------------------|---------------------|------------------|--------------------------|
| $\alpha$ value | 0.982±0.002      | 0.983±0.002         | 0.989±0.001      | 0.993±0.003              |
| $n$ values     | 1.52±0.03 $kT/q$ | 1.51±0.04 $kT/q$    | 1.44±0.02 $kT/q$ | 1.25±0.03 $kT/q$         |

**Table S12.** Performances of devices based on blends of PM6-b-PYIT with BTP-eC9 or L8-BO and doped by N-DMBI under the illumination of AM 1.5G, 100 mW cm<sup>-2</sup>. <sup>a</sup>

| Active layer                               | V <sub>OC</sub> (V)    | J <sub>SC</sub> (mA/cm <sup>2</sup> ) | FF (%)             | PCE (%)            |
|--------------------------------------------|------------------------|---------------------------------------|--------------------|--------------------|
| PM6-b-PYIT<br>+3%BTP-eC9                   | 0.931<br>(0.930±0.001) | 23.5<br>(23.2±0.3)                    | 67.3<br>(67.1±0.2) | 14.7<br>(14.6±0.1) |
| PM6-b-PYIT<br>+5%BTP-eC9+0.05%wt<br>N-DMBI | 0.939<br>(0.938±0.001) | 23.5<br>(23.3±0.1)                    | 69.1<br>(68.6±0.4) | 15.2<br>(15.1±0.1) |
| PM6-b-PYIT<br>+3%L8-BO                     | 0.933<br>(0.932±0.001) | 24.2<br>(23.8±0.3)                    | 65.7<br>(64.9±0.5) | 14.8<br>(14.5±0.2) |
| PM6-b-PYIT<br>+5%L8-BO+0.05%wt N-<br>DMBI  | 0.938<br>(0.937±0.001) | 24.0<br>(23.8±0.1)                    | 69.0<br>(68.3±0.5) | 15.5<br>(15.4±0.1) |

<sup>a</sup> The parameters were obtained over 10 independent devices.

**Table S13.** Optimized XGBoost model hyperparameters.

| Hyperparameter | Purpose of the Hyperparameter | Value |
|----------------|-------------------------------|-------|
| n_estimators   | Number of decision trees      | 100   |
| max_depth      | Depth of the tree             | 3     |
| learning_rate  | Learning rate                 | 0.05  |
| subsample      | Sample Sampling Ratio         | 0.5   |

**Table S14.** Normalized photovoltaic parameters of PM6-b-PYIT OSCs in nitrogen atmosphere for up to 1000 h storage under 85°C continuous annealing under dark condition. <sup>a</sup>

| Time (h) | V <sub>OC</sub> (V) | Er±   | J <sub>SC</sub> (mA cm <sup>-2</sup> ) | Er±   | FF (%) | Er±   | PCE (%) | Er±   |
|----------|---------------------|-------|----------------------------------------|-------|--------|-------|---------|-------|
| 0        | 1.000               | 0.005 | 1.000                                  | 0.026 | 1.000  | 0.020 | 1.000   | 0.036 |
| 6        | 0.998               | 0.002 | 0.999                                  | 0.018 | 0.961  | 0.010 | 0.877   | 0.011 |
| 18       | 0.989               | 0.002 | 0.989                                  | 0.017 | 0.938  | 0.017 | 0.829   | 0.030 |
| 40       | 0.986               | 0.003 | 0.975                                  | 0.013 | 0.925  | 0.020 | 0.812   | 0.026 |
| 52       | 0.987               | 0.001 | 0.951                                  | 0.009 | 0.915  | 0.011 | 0.813   | 0.014 |
| 64       | 0.983               | 0.003 | 0.937                                  | 0.023 | 0.902  | 0.017 | 0.807   | 0.031 |
| 88       | 0.975               | 0.001 | 0.929                                  | 0.015 | 0.901  | 0.013 | 0.763   | 0.024 |
| 112      | 0.976               | 0.009 | 0.903                                  | 0.017 | 0.886  | 0.022 | 0.739   | 0.017 |
| 144      | 0.974               | 0.007 | 0.896                                  | 0.023 | 0.893  | 0.007 | 0.735   | 0.021 |
| 176      | 0.974               | 0.012 | 0.859                                  | 0.033 | 0.886  | 0.013 | 0.706   | 0.027 |
| 240      | 0.976               | 0.013 | 0.876                                  | 0.025 | 0.885  | 0.013 | 0.718   | 0.022 |
| 312      | 0.974               | 0.017 | 0.856                                  | 0.028 | 0.876  | 0.013 | 0.708   | 0.032 |
| 420      | 0.976               | 0.003 | 0.843                                  | 0.015 | 0.863  | 0.022 | 0.725   | 0.021 |
| 600      | 0.974               | 0.001 | 0.841                                  | 0.017 | 0.854  | 0.013 | 0.706   | 0.027 |
| 800      | 0.972               | 0.009 | 0.835                                  | 0.023 | 0.850  | 0.022 | 0.718   | 0.022 |
| 1000     | 0.970               | 0.007 | 0.833                                  | 0.033 | 0.846  | 0.007 | 0.708   | 0.032 |

<sup>a</sup>The parameters are obtained from 5 independent devices.



**Table S15.** Normalized photovoltaic parameters of PM6-b-PYIT+3%Y6 OSCs in nitrogen atmosphere for up to 1000 h storage under 85°C continuous annealing under dark condition. <sup>a</sup>

| Time (h) | V <sub>OC</sub> (V) | Er±   | J <sub>SC</sub> (mA cm <sup>-2</sup> ) | Er±   | FF (%) | Er±   | PCE (%) | Er±   |
|----------|---------------------|-------|----------------------------------------|-------|--------|-------|---------|-------|
| 0        | 1.000               | 0.003 | 1.000                                  | 0.008 | 1.000  | 0.012 | 1.000   | 0.020 |
| 6        | 0.995               | 0.002 | 0.985                                  | 0.006 | 0.970  | 0.008 | 0.923   | 0.012 |
| 18       | 0.991               | 0.002 | 0.979                                  | 0.014 | 0.953  | 0.009 | 0.889   | 0.012 |
| 40       | 0.989               | 0.004 | 0.951                                  | 0.029 | 0.944  | 0.002 | 0.872   | 0.027 |
| 52       | 0.980               | 0.002 | 0.933                                  | 0.017 | 0.934  | 0.004 | 0.850   | 0.014 |
| 64       | 0.981               | 0.004 | 0.933                                  | 0.023 | 0.923  | 0.005 | 0.807   | 0.019 |
| 88       | 0.977               | 0.002 | 0.933                                  | 0.021 | 0.902  | 0.006 | 0.820   | 0.015 |
| 112      | 0.978               | 0.010 | 0.926                                  | 0.026 | 0.913  | 0.006 | 0.796   | 0.026 |
| 144      | 0.973               | 0.008 | 0.897                                  | 0.022 | 0.903  | 0.011 | 0.788   | 0.026 |
| 176      | 0.975               | 0.009 | 0.905                                  | 0.020 | 0.896  | 0.008 | 0.781   | 0.025 |
| 240      | 0.973               | 0.010 | 0.914                                  | 0.015 | 0.901  | 0.027 | 0.776   | 0.028 |
| 312      | 0.974               | 0.018 | 0.893                                  | 0.017 | 0.895  | 0.024 | 0.755   | 0.026 |
| 420      | 0.973               | 0.002 | 0.887                                  | 0.014 | 0.890  | 0.011 | 0.768   | 0.026 |
| 600      | 0.975               | 0.010 | 0.885                                  | 0.029 | 0.886  | 0.008 | 0.761   | 0.025 |
| 800      | 0.973               | 0.008 | 0.871                                  | 0.017 | 0.874  | 0.027 | 0.756   | 0.028 |
| 1000     | 0.970               | 0.009 | 0.869                                  | 0.023 | 0.873  | 0.024 | 0.745   | 0.026 |

<sup>a</sup> The parameters are obtained from 5 independent devices.

**Table S16.** Normalized photovoltaic parameters of PM6-b-PYIT+3%Y6 doped OSCs in nitrogen atmosphere for up to 1000 h storage under 85°C continuous annealing under dark condition. <sup>a</sup>

| Time (h) | V <sub>OC</sub> (V) | Er±   | J <sub>SC</sub> (mA cm <sup>-2</sup> ) | Er±   | FF (%) | Er±   | PCE (%) | Er±   |
|----------|---------------------|-------|----------------------------------------|-------|--------|-------|---------|-------|
| 0        | 1.000               | 0.003 | 1.000                                  | 0.017 | 1.000  | 0.020 | 1.000   | 0.033 |
| 6        | 0.998               | 0.003 | 0.992                                  | 0.010 | 0.965  | 0.016 | 0.940   | 0.023 |
| 18       | 0.994               | 0.003 | 0.989                                  | 0.014 | 0.960  | 0.024 | 0.900   | 0.036 |
| 40       | 0.991               | 0.003 | 0.978                                  | 0.014 | 0.945  | 0.017 | 0.885   | 0.026 |
| 52       | 0.990               | 0.004 | 0.985                                  | 0.018 | 0.941  | 0.012 | 0.878   | 0.026 |
| 64       | 0.985               | 0.003 | 0.980                                  | 0.022 | 0.937  | 0.005 | 0.882   | 0.025 |
| 88       | 0.981               | 0.004 | 0.973                                  | 0.019 | 0.935  | 0.012 | 0.873   | 0.026 |
| 112      | 0.979               | 0.001 | 0.981                                  | 0.006 | 0.937  | 0.007 | 0.886   | 0.011 |
| 144      | 0.979               | 0.002 | 0.961                                  | 0.017 | 0.942  | 0.013 | 0.859   | 0.006 |
| 176      | 0.977               | 0.004 | 0.962                                  | 0.019 | 0.935  | 0.007 | 0.855   | 0.019 |
| 240      | 0.974               | 0.007 | 0.963                                  | 0.017 | 0.936  | 0.010 | 0.851   | 0.023 |
| 312      | 0.972               | 0.008 | 0.954                                  | 0.019 | 0.929  | 0.036 | 0.843   | 0.023 |
| 420      | 0.981               | 0.004 | 0.931                                  | 0.019 | 0.916  | 0.013 | 0.849   | 0.026 |
| 600      | 0.979               | 0.003 | 0.935                                  | 0.006 | 0.913  | 0.007 | 0.845   | 0.026 |
| 800      | 0.979               | 0.004 | 0.923                                  | 0.017 | 0.906  | 0.010 | 0.840   | 0.025 |
| 1000     | 0.977               | 0.001 | 0.921                                  | 0.019 | 0.903  | 0.036 | 0.833   | 0.026 |

<sup>a</sup> The parameters are obtained from 5 independent devices.

#### 4. Supplemental Reference

1. A. Hexemer, W. Bras, J. Glossinger, E. Schaible, E. Gann, R. Kirian, A. MacDowell, M. Church, B. Rude and H. Padmore, *J. Phys.: Conference Series*, 2010, **247**, 012007.
2. F. Neese, *WIREs Comput. Molecular Sci.*, 2022, **12**, 1606.
3. F. Neese, F. Wennmohs, U. Becker and C. Riplinger, *J. Chem. Phys.*, 2020, **152**, 224108.
4. T. Lu and F. Chen, *J. Comput. Chem.*, 2012, **33**, 580-592.
